# Supplementary material for: Inhibition of colony stimulating factor-1 receptor improves antitumor efficacy of BRAF inhibition
Source: BMC Cancer. 2015 May 5;15:356. doi: 10.1186/s12885-015-1377-8 (PMC4432503; doi:10.1186/s12885-015-1377-8)

**Supplemental Table 1.** Top up-regulated genes in macrophages in combined treatment group with significant GO terms

| <b>GOID</b> | <b>GO Term</b>                         | <b>P-value</b> | <b>Bonferroni P-value</b> |
|-------------|----------------------------------------|----------------|---------------------------|
| GO:0034097  | response to cytokine                   | 4.82E-04       | 1.01E-06                  |
| GO:0035458  | cellular response to interferon-beta   | 1.66E-03       | 3.47E-06                  |
| GO:0071345  | cellular response to cytokine stimulus | 2.26E-03       | 4.71E-06                  |
| GO:0035456  | response to interferon-beta            | 3.06E-03       | 6.39E-06                  |

**Supplemental Table 2.** Top down-regulated genes in macrophages in combined treatment group with significant GO terms

| <b>GOID</b> | <b>GO Term</b>                    | <b>P-value</b> | <b>Bonferroni P-value</b> |
|-------------|-----------------------------------|----------------|---------------------------|
| GO:0001944  | vasculature development           | 2.55E-11       | 1.62E-14                  |
| GO:0001568  | blood vessel development          | 3.99E-11       | 2.54E-14                  |
| GO:0016477  | cell migration                    | 2.53E-10       | 1.61E-13                  |
| GO:0072358  | cardiovascular system development | 7.81E-10       | 4.97E-13                  |
| GO:0072359  | circulatory system development    | 7.81E-10       | 4.97E-13                  |
| GO:0048870  | cell motility                     | 2.99E-09       | 1.90E-12                  |
| GO:0051674  | localization of cell              | 2.99E-09       | 1.90E-12                  |
| GO:0048514  | blood vessel morphogenesis        | 3.36E-08       | 2.14E-11                  |
| GO:0009611  | response to wounding              | 4.44E-08       | 2.82E-11                  |
| GO:0040011  | locomotion                        | 1.10E-07       | 7.01E-11                  |
| GO:0001525  | angiogenesis                      | 1.80E-07       | 1.14E-10                  |

## Supplemental Figure Legends

**Supplemental Figure 1. Polarization of macrophages and expression of IFN- $\gamma$  mediated by PLX3397 and PLX4032.** Heat maps for the top **a)** up-regulated and **b)** down-regulated genes in F4/80(+) CD11b(+) macrophages in combined treatment group. Color scale, log<sub>2</sub>-transformed fold change expression (red, high; green, low) for each gene (row) normalized by the mean of all samples. **c)** Relative expression of IFN- $\gamma$  mRNA in CD3(+) CD8(+) T-cells in SM1 tumors treated with PLX3397 and PLX4032 for 5 days. Biological replicates from each treatment group were shown. The level of IFN- $\gamma$  expression reflected the activation status of T-cells. The IFN- $\gamma$  expression in vehicle group was randomly scattered suggesting the T-cells were not well activated. All three drug-treatment groups had significant induction of IFN- $\gamma$  expression.

# Supplemental Figure 1

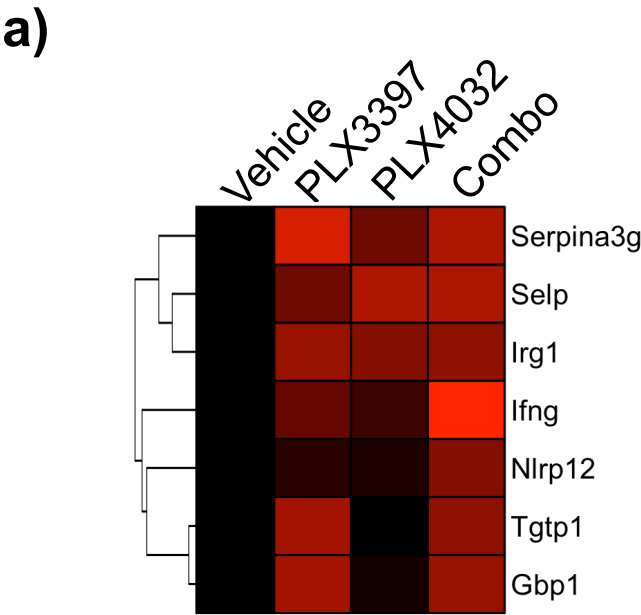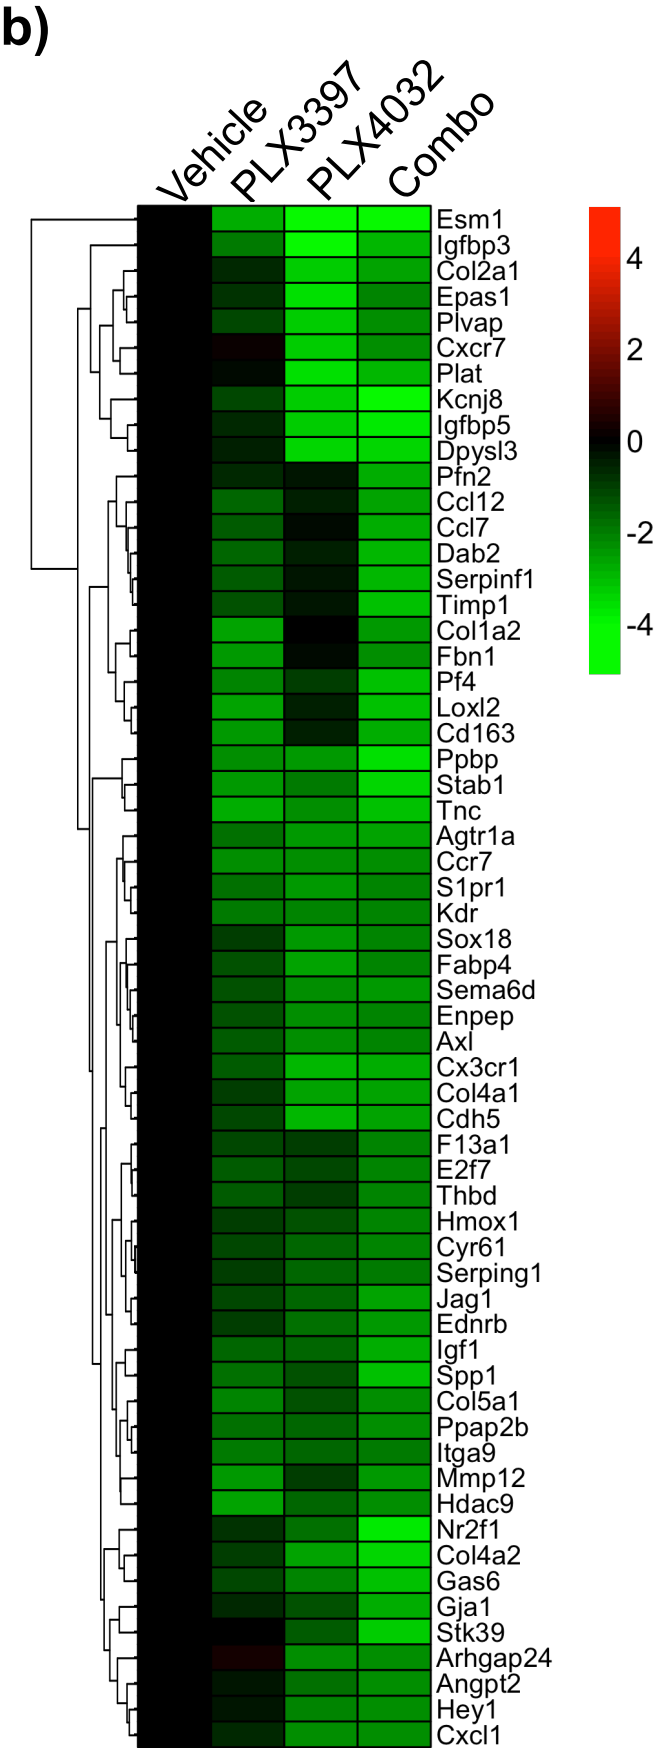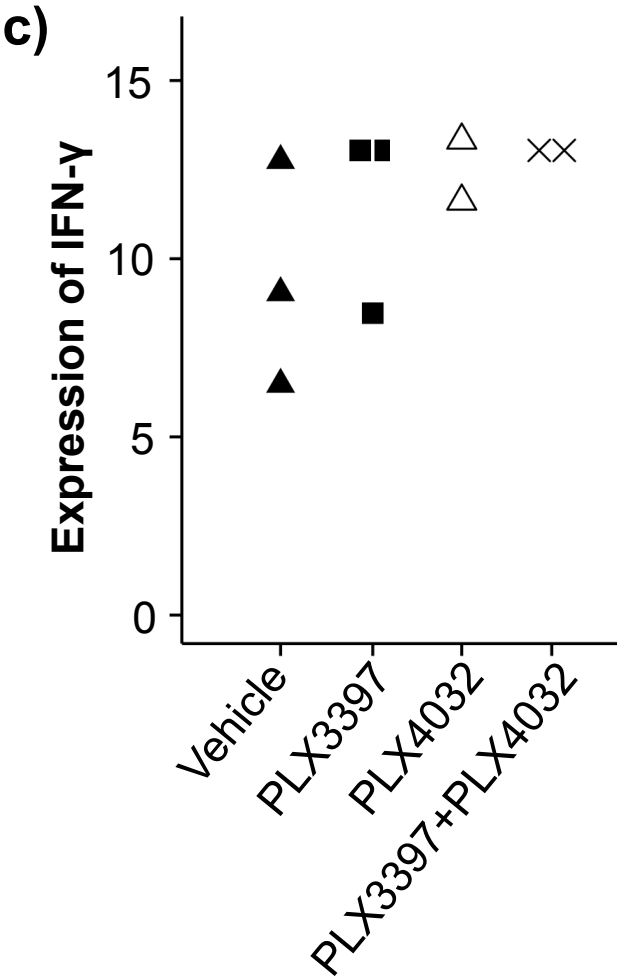

Supplement: Additional file 1: Table S1. — Top up-regulated genes in macrophages in combined treatment group with significant GO terms. Table S2. Top down-regulated genes in macrophages in combined treatment group with significant GO terms. Figure S1. Polarization of macrophages and expression of IFN-γ mediated by PLX3397 and PLX4032. [file 12885_2015_1377_MOESM1_ESM.pdf]
